1 **Habitat protection and restoration: win-win opportunities for migratory birds in the**  
2 **Northern Andes**

3  
4 Ana M. Gonzalez<sup>1</sup>, Nestor Espejo<sup>2</sup>, Dolors Armenteras<sup>3</sup>, Keith A. Hobson<sup>4,5</sup>, Kevin J. Kardynal<sup>4</sup>,  
5 Greg W. Mitchell<sup>6,7</sup>, Nancy Mahony<sup>8</sup>, Christine A. Bishop<sup>1</sup>, Pablo J. Negret<sup>9</sup>, and Scott  
6 Wilson<sup>1,10</sup>

7  
8 <sup>1</sup>Wildlife Research Division, Science and Technology Branch, Environment and Climate Change  
9 Canada, Delta, BC, Canada

10  
11 <sup>2</sup>Parques Nacionales Naturales de Colombia, Bogotá, Colombia.

12  
13 <sup>3</sup>Laboratorio de Ecología del Paisaje y Modelación de Ecosistemas ECOLMOD, Departamento  
14 de Biología, Facultad de Ciencias, Universidad Nacional de Colombia, Edificio 421, 111321  
15 Bogotá, Colombia

16  
17 <sup>4</sup>Wildlife Research Division, Science and Technology Branch, Environment and Climate  
18 Change Canada, Saskatoon, Saskatchewan, Canada

19  
20 <sup>5</sup>Department of Biology, University of Western Ontario, London, Ontario, Canada

21  
22 <sup>6</sup>Environment and Climate Change Canada, Science and Technology, 1125 Colonel By Drive,  
23 Ottawa, Ontario K1S 5B6, Canada

24  
25 <sup>7</sup>Department of Biology, Carleton University, 1125 Colonel By Drive, Ottawa, Ontario K1S  
26 5B6, Canada

27  
28 <sup>8</sup>Wildlife Research Division, Environment and Climate Change Canada, Edmonton, Alberta,  
29 Canada

30  
31 <sup>9</sup>Centre for Biodiversity and Conservation Science. University of Queensland. Queensland,  
32 Australia.

33  
34 <sup>10</sup>Department of Forest and Conservation Sciences, University of British Columbia, 2424 Main  
35 Mall, Vancouver, B.C. V6T 1Z4, Canada

36  
37  
38  
39  
40

41

42

43

## 44 **Abstract**

45 Identifying strategies that offer co-benefits for biodiversity protection, forest restoration and  
46 human well-being are important for successful conservation outcomes. In this study, we  
47 identified opportunities where forest restoration and rehabilitation programs in Colombia also  
48 align with priority areas for the conservation of Neotropical migratory birds. We used citizen  
49 science eBird-based abundance estimates to define regions with the highest richness of  
50 Neotropical migratory birds of conservation concern at montane elevations in Colombia and  
51 aligned these high richness areas with domestic initiatives for forest protection (Forest Areas),  
52 restoration (Restoration Areas) and rehabilitation (Rehabilitation Areas). We quantified the  
53 location and amounts of these three areas as well as the type of land protection and designation  
54 within them, specifically, National Protected Areas, Indigenous Reserves, Afro-descendent  
55 territories, and regions affected by poverty and violence that are prioritized for rural development  
56 by the Colombian government in Post-conflict Territorially Focused Development Programs  
57 (PDET). Almost half of Forest Areas overlapped with PDETs where goals for economic  
58 development present a risk of forest loss if not done sustainably. There was a 20% overlap  
59 between Forest Areas and Afro-descendant territories and indigenous reserves; most of this  
60 overlap was outside of established protected areas thus presenting an opportunity for community  
61 forest conservation that benefits migratory birds. We found an alignment of less than 6%  
62 between migrant bird focal areas and the priority Restoration and Rehabilitation Planning Areas  
63 identified by the Colombian National Restoration Plan indicating less opportunity for these  
64 programs to simultaneously benefit Neotropical migrant species. Our approach highlights that  
65 timely and efficient conservation of declining migrants depends on identifying the regions and  
66 strategies that incorporate local communities as part of the solution to forest loss and degradation  
67 in Colombia.

68

69

70

71

72

73 **Highlights**

74 Colombia covers over half of key wintering areas for migratory birds in South America

75 Most of the migrants' overwinter range overlaps with working landscapes

76 Priority national restoration/rehabilitation areas are ineffective to benefit migrants

77 Forest conservation needs actions involving vulnerable and minority groups

78

79

80

81

82

83

84

85

86

87

88

89

90

91

92

93

94

95 **Key words:** Neotropical migrants, conservation, working landscapes, overwinter period, eBird

## 96 **Introduction**

97 With multiple competing demands for land use and limited resources for conservation, national  
98 institutions mandated to recover declining species are increasingly being tasked to do more with  
99 less (Murdoch et al., 2007). Under such circumstances, the success of conservation programs  
100 could be enhanced if multiple initiatives are addressed simultaneously, resulting in a win-win  
101 approach (López-Cubillos et al., 2022). For example, institutions might differentially focus on  
102 either conserving tropical biodiversity or enhancing rural economic development, but both  
103 benefit from forest conservation and/or restoration to create a more sustainable landscape for  
104 biodiversity and humans alike (Chazdon, 2008). In this study, we show the potential to align  
105 conservation efforts to protect declining migratory bird species with forest protection and  
106 restoration initiatives in Colombia that aim to improve the welfare and resilience of local  
107 communities.

108 The South American Andes are an important non-breeding (i.e., wintering) area for many  
109 Neotropical migratory birds that migrate between their temperate breeding grounds in North  
110 America and their wintering grounds in the Neotropics. Among all Neotropical migrant birds,  
111 population declines are particularly severe for those species that overwinter in South America  
112 where 40% of the total bird abundance has been lost in the last 50 years and 76% of species are  
113 in decline (Rosenberg et al., 2019). The northern Andes of Colombia in particular is a region of  
114 high conservation importance due to the number of declining Neotropical migrant species  
115 occurring there (Wilson et al., 2019) with evidence indicating that habitat loss and degradation in  
116 the Andes being the primary cause of these declines (González et al., 2017; Kramer et al., 2018;  
117 Wilson et al., 2019, 2018). Recognition of the importance of the Andes to Neotropical migrants  
118 has resulted in governmental and non-governmental organizations (NGOs) from Canada and the  
119 United States directing resources to conservation efforts in South America, particularly towards  
120 those species on federal or regional conservation priority lists where there is a mandate for their  
121 recovery (ESA, 1973; SARA, 2002; Wilson et al., 2022).

122 The Colombian wintering range of most Neotropical migrants of conservation concern falls  
123 within mid elevations of mountainous regions between 1000-2300 m asl (Céspedes et al., 2021;  
124 Céspedes and Bayly, 2019; Colorado et al., 2012). These regions have had a long and persistent  
125 history of high anthropogenic impact with the result that they are now highly modified

126 (Armenteras et al., 2011; Correa Ayram et al., 2020). Across mid elevations along inter-Andean  
127 valleys where the core of the human colonization frontier was located, the expansion of crop  
128 agriculture and cattle pastures were the major drivers of deforestation (Etter et al., 2008). As a  
129 result of these transformations, many montane regions in Colombia are already highly  
130 developed, with deforestation hotspots now progressing into more remote and inaccessible  
131 regions where remaining native forest is concentrated (Armenteras et al., 2011, 2003; González  
132 et al., 2018).

133 Colombia also went through over 50 years of armed conflict (1964-2016) with the Revolutionary  
134 Armed Forces of Colombia (FARC-EP) until a Peace Agreement was signed in 2016 (JEP 2016).  
135 The internal conflict further shaped rural landscapes by affecting livelihoods and agricultural  
136 production, with small farmers being the most affected (Arias et al., 2014). For instance, between  
137 2000 and 2016 there was some recovery of woody vegetation in the highly deforested 1000-1500  
138 m elevation belt where, driven by forced displacement of the rural population during the armed  
139 conflict, the abandonment of pasture and crops (Aide et al., 2019). However, that succession is  
140 already being reversed and further forest loss is projected across the country with the  
141 implementation of the Colombian post-conflict land reform which incentivizes rural economic  
142 development (Negret et al., 2017; Zúñiga-Upegui et al., 2019).

143 At the same time, concern over forest loss and degradation has led to a growing recognition of  
144 the importance of landscape protection and restoration within Colombia (Minambiente, 2015;  
145 Ministerio de Agricultura y Desarrollo Rural, 2020), specially for forest dependent birds (Negret  
146 et al., 2021). Landscape restoration in particular is emphasized as part of the Ecological  
147 Restoration, Rehabilitation and Recuperation of Degraded Areas National Plan (hereafter  
148 National Restoration Plan, Vanegas Pinzón et al., 2015). This plan aims to guide and promote  
149 integral ecological restoration processes during the next 20 years to recover the structure,  
150 composition and function of ecosystems in order to recover biodiversity and ecosystem services  
151 in key degraded areas of the country. The plan identified priority regions where the ecosystem  
152 can either be i) restored and returned to a natural state when the amount of degradation is low, ii)  
153 rehabilitated when returning to the natural state is possible but challenging under moderate levels  
154 of degradation, or iii) recuperated to some extent when degradation is severe (Vanegas Pinzón et  
155 al., 2015). To examine the potential for dual benefits from this plan to migratory animals and

156 rural human populations, we combined information on the wintering distribution of Neotropical  
157 migrant birds with areas targeted by the plan. Importantly, Colombia's efforts towards increasing  
158 protected areas and restoration may present an opportunity to align and coordinate the  
159 conservation of Neotropical migrants that are dependent on forested areas and whose recovery  
160 will benefit from restoration.

161

162 We used data on avian distribution and abundance from the eBird Status and Trends project  
163 (Fink et al., 2018) to define priority overwintering regions in the Colombian Andes for six  
164 Neotropical migrant species that are the focus of ongoing local and international conservation  
165 efforts. We then overlaid focal areas of high richness for these species with the distribution of  
166 protected and unprotected forests (hereafter 'Forest Areas'), and lands prioritized for  
167 rehabilitation ('Rehabilitation Planning Areas') and restoration ('Restoration Planning Areas') in  
168 the Colombian National Restoration Plan (Vanegas Pinzón et al., 2015). This was done to  
169 delineate areas where forest protection, rehabilitation and restoration has an opportunity to  
170 benefit migratory bird conservation. After identifying these Forest, Rehabilitation and  
171 Restoration Planning Areas, we quantified the extent of lands stewarded by local communities  
172 because we assume this will further influence the likely activities on those lands and the  
173 strategies needed to recover migratory birds. To examine stewardship, we identified the overlap  
174 between these three areas and 1) Protected Areas; 2) Afro-descendant territories, Indigenous  
175 Reserves; 3) Post-conflict Territories, which are regions particularly affected by poverty,  
176 violence and inequality prioritized for rural development by the Colombian Government as  
177 detailed in Post-conflict Development Programs; and 4) with the jurisdiction of state entities  
178 responsible for environmental planning and administrating natural resources at a regional level.  
179 Although we focused on Colombia, this approach is also relevant to other countries in northern  
180 South America, Central America and the Caribbean developing plans for conservation and  
181 restoration of habitat for Neotropical migrants.

182

183

184

185

186

187 **Methods**

188

189 **Study area**

190 The area of geographic review was across the Andean mountains of Colombia. This region is a  
191 global hotspot of threatened and endemic bird species (Orme et al., 2005); and is considered  
192 critical for global biodiversity conservation (Myers et al., 2000). The Andes of Colombia are  
193 divided into three cordilleras separated by dry and deep basins. The Cauca basin separates the  
194 West and Central cordilleras, and the Magdalena basin separates the Central and East cordilleras.  
195 Andean forest zoning along the slopes of each cordillera is mainly defined by gradients of  
196 temperature and precipitation relative to elevation as follows (Holdridge, 1947): Tropical low-  
197 elevation forest (<900–1,000 m), Premontane forest (1000-2000 m asl), Lower Montane forest  
198 (2000-3000 m asl), and Montane forest (3000-4000 m asl). Precipitation varies within each  
199 elevation belt resulting in further classification of forest into moist forest (1000-2000 mm/year),  
200 wet forest (2000-4000 mm/year), and rain forest (>4000 mm/year).

201

202 Our study region encompassed the elevation belt between 1000-2300 m asl (hereafter Montane  
203 Forest or Montane elevations). We chose this elevation belt for four reasons: 1) Several  
204 Neotropical migrants showing population declines depend on forest and agroecosystems located  
205 across that range in South America (Céspedes et al., 2021; Céspedes and Bayly, 2019; Colorado  
206 et al., 2012; González et al., 2020b; Kramer et al., 2018), 2) the range has a persistent history of  
207 loss of natural habitat driven by pastoral, agricultural and urban development that continues  
208 today across South America (Armenteras et al., 2011; Tejedor-Garavito et al., 2012), 3) drivers  
209 of habitat loss here differ from regions located below 1000 m asl (González et al., 2018,  
210 Supplemental Material Table 1), and 4) this range is the geographic focus of ongoing efforts for  
211 the conservation of declining Neotropical migrants (Partners In Flight, 2019).

212 **Analysis**

213 Our prioritization targeted six Neotropical migratory species of conservation concern listed on  
214 Canada's Species at Risk Act (SARA 2002) and/or the United States Endangered Species Act  
215 (ESA, 1973): Olive-sided Flycatcher (*Contopus cooperi*), Eastern Wood-Pewee (*Contopus*  
216 *virens*), Acadian Flycatcher (*Empidonax virescens*), Golden-winged Warbler (*Vermivora*  
217 *chrysoptera*), Cerulean Warbler (*Setophaga cerulea*), and Canada Warbler (*Cardellina*

218 *canadensis*). We selected those species because they spend the non-breeding period exclusively  
219 in montane areas of Latin America, and had information from eBird on their non-breeding  
220 distributions and abundance.

221  
222 We used a digital elevation model with 900 m resolution to estimate the area in the elevation belt  
223 of interest (1000-2300 m asl) in Colombia, Venezuela, Ecuador, and northern Peru and to assess  
224 the relative importance of our study area in terms of the total amount of area available as  
225 potential habitat for Neotropical migrants.

226  
227 We used species-specific weekly estimates of relative abundance from the eBird Status and  
228 Trends project (Fink et al. 2018) to define the Colombian non-breeding range for the six species,  
229 following the approach in (Wilson et al., 2022). The eBird relative abundance estimates are  
230 defined as the predicted number of individuals on a one-hour, one-kilometer eBird checklist  
231 conducted at the ideal time of day for detection of the species in every week of the year, at a  
232 pixel resolution of 2.96 km<sup>2</sup> (Fink et al., 2018). These relative abundance estimates are generated  
233 from an ensemble modeling strategy based on an Adaptive Spatio-Temporal Exploratory Model  
234 and include environmental predictors, temporal variation and observer effort to account for  
235 detectability (Fink et al., 2020). Thus, for all six species there is a weekly distribution map that  
236 includes the estimated relative abundance of the species in each 2.96km<sup>2</sup> pixel. Using these  
237 maps, we focused on the non-breeding season, which was defined from 1 November to 31 March  
238 and, then we estimated the average relative abundance per pixel across all weeks for each  
239 species. Migratory species often have low abundance at range edges and we only selected pixels  
240 that represented a cumulative 95% of total abundance of each species to focus on their core  
241 nonbreeding range. The rasters for the 95% of total abundance for each species were then  
242 converted to a presence-absence raster where any pixel that contributed to the 95% abundance  
243 was assigned a 1 and all other pixels were assigned a 0. These presence-absence rasters for the  
244 six species were then stacked using package Raster (Hijmans, 2019) in R version 4.0.3 (R Core  
245 Team, 2020) and the stacked estimates for each pixel were used to estimate species richness per  
246 pixel (i.e. the number of focal species present in each pixel). From this derived map of species  
247 richness, we then selected areas with 4 or more species present to focus our analysis on regions  
248 that provide benefit for multiple migratory species. As a final step, we restricted this derived



249 species richness layer to the 1000 to 2300 m asl range within Colombia and defined this as our  
250 Migrant Focal Area. We acknowledge that a richness-based distribution map will not allow us to  
251 incorporate differences in abundance into the consideration of priority areas for migratory birds.  
252 However, the six species differ in abundance across the wintering grounds and we chose a  
253 method that treated all six species equally rather than favoring those that are more abundant.

254

255 We used the 2018 land use and land cover maps (C-LULC) applying the Corine and Land Cover  
256 methodology adapted for Colombia (IDEAM, 2018) to derive Forested Areas within Migrant  
257 Focal Areas and to assess other land uses (Supplemental Material Table 2). Forest Areas were  
258 considered as land with a minimum tree canopy cover of 30%, minimum canopy height of 5 m,  
259 and a minimum area of 1 ha (IDEAM, 2018). Within the Migrant Focal Areas we also identified  
260 regions that overlapped with areas prioritized for rehabilitation and restoration in the National  
261 Restoration Plan (Vanegas Pinzón et al., 2015); these overlapping areas represented our  
262 Restoration and Rehabilitation Planning Areas. Forested, restoration and rehabilitation areas  
263 were transformed to a raster format of 100 m resolution/pixel.

264 After identifying our Forest, Restoration and Rehabilitation Planning Areas, we assessed their  
265 protected status and stewardship by examining the area covered by 1) National Protected Areas  
266 (RUNAP 2021), 2) unprotected areas, 3) Indigenous Reserves and Afro-descendent territories  
267 (IGAC, 2021), 4) regions prioritized in Post-conflict Territorially Focused Development  
268 Programs (PDET hereafter post-conflict territories, IGAC 2021), and 5) Autonomous Regional  
269 Corporations (CARs), which are the state entities responsible for decentralized environmental  
270 governance by implementing and enforcing law and policies developed by the Ministry of the  
271 Environment (Table 1). As such, the 33 CARs across the country are responsible for regional  
272 environmental planning and administrating natural resources within their jurisdictions. The total  
273 area and percentage of overlap of the Migrant Focal Areas with the land classes mentioned  
274 above was calculated using ArcMap 10.5 (ESRI, 2019).

275 National Protected Areas were classified according to their management objectives as follows  
276 (IUCN, 2008, Supplemental Material Table 3): (Ib) Wilderness Areas which are largely  
277 unmodified and their primary objective is to preserve their natural condition; (II) National Parks  
278 which are large natural areas set apart to protect their natural biodiversity, ecological structure

279 and promote education and recreation; (V) Protected Landscapes which are areas that maintain  
280 their integrity by a balanced interaction between people and nature through traditional  
281 management practices; and (VI) Protected Areas with Sustainable Use of Natural Resources  
282 where most of the area is in a natural condition, but some areas are under sustainable natural  
283 resource management. All protected areas form the National Protected Areas System (SINAP).

## 284 **Results**

285 The elevation belt between 1000 and 2300 m across Colombia, Venezuela, Ecuador and northern  
286 Peru covers 22,575,202 ha. Most of this elevation range falls in Colombia (57%) followed by  
287 Ecuador (18%), Peru (13%), and Venezuela (11%). Migrant Focal Areas within that elevation  
288 belt covered 10,831,472 ha across the three Andean chains in Colombia. Forest Areas covered  
289 4,115,368 ha corresponding to 38% of Migrant Focal Areas. Most of the non-forest areas were  
290 covered by crop (30%), followed by pasture (17%), early successional habitats (12%), and  
291 agroforestry systems (3%, Supplemental Material Table 2).

292

### 293 *Forest Areas*

294 Forest Areas were concentrated in the western slope of the West Andes and the eastern slope of  
295 the East Andes (Figure 1). Post-conflict territories had the largest amount of land overlapping  
296 with Forest Areas (47%), followed by National Protected Areas (30%), and Afro-descendant  
297 territories and Indigenous Reserves (19%) (Figure 2a, 2b). Only 2% of Forest Areas in Afro-  
298 descendant territories and indigenous reserves overlapped with protected areas. Protected areas  
299 within our Forest Area category were primarily represented by National Parks (IUCN category  
300 II, 79% coverage) followed by Protected Areas with Sustainable Use of Natural Resources  
301 (IUCN category VI, 20% coverage).

302

303 Forest Areas overlapped with National Parks primarily in the eastern slope of the East Andes  
304 including Cordillera de Los Picachos, Cocuy, Serrania de Los Chumbelos and Serrania de los  
305 Yariguies; and the western slope of the West Andes including Paramillo, Sierra de la Macarena  
306 and Farallones de Cali National Parks (Figure 2a). Over 50% of Forest Areas fell within the  
307 jurisdiction of five CARs localized in the east and southwest of the country: Corpoamazonia,  
308 Corponariño, Corporación Autónoma Regional del Cauca, Codechoco, Corporinoquia, and  
309 Cormacarena (Supplemental Material Table 4, and Figure 2).

### 310 *Restoration and Rehabilitation Planning Areas*

311 The overlap between Migrant Focal Areas and areas prioritized by the Colombian National  
312 Restoration Plan was low. Specifically, Restoration and Rehabilitation Planning Areas covered  
313 only 2.5% and 2.9% of Migrant Focal Areas respectively (Figure 1). Most Restoration Planning  
314 Areas were located in the Magdalena valley while Rehabilitation Planning Areas were located in  
315 the Cauca Valley, along the western slope of the Central Andes (Figure 1). Within the  
316 Restoration and Rehabilitation Planning Areas, 32% and 19% of the area was protected,  
317 respectively. However, unlike Forest Areas, where protected areas were primarily represented by  
318 National Parks (IUCN class II), the majority of protected area falling within Restoration and  
319 Rehabilitation Planning Areas was designated as Sustainable Use of Natural Resources (IUCN  
320 class VI). Specifically, 55% and 67% of the protected area within Restoration and Rehabilitation  
321 Planning Areas, respectively, fell within this class.

322

323 Afro-descendant territories and Indigenous Reserves overlapped with less than 3% of both  
324 Restoration and Rehabilitation Planning Areas. There was a greater representation of post-  
325 conflict territories, which represented 19% and 16% of Restoration and Rehabilitation Planning  
326 Areas, respectively. The CARs of Cauca, Tolima, Santander, Cundinamarca and Huila located in  
327 the Central and East Andes had over 50% of Restoration and Rehabilitation Planning Areas  
328 within their jurisdictions (Supplemental Material Table 4 and Figure 2).

329

### 330 **Discussion**

331

332 The scale and complexity of conservation issues faced by Neotropical migrants during the  
333 wintering period requires the identification and targeting of regions across remaining forested  
334 habitats and disturbed landscapes used by migrants as well as the collaboration of individuals  
335 across administrative boundaries, land ownership and political jurisdictions (Scarlett and  
336 McKinney, 2016; Schuster et al., 2019). Colombia is a critically important wintering area for  
337 numerous Neotropical migrant birds in decline (Cespedes et al., 2021; González et al., 2017;  
338 Wilson et al., 2018) and is also a global biodiversity hotspot (Myers et al., 2000). By focusing  
339 this study on Colombia, we aimed to provide information on the extent to which goals for  
340 migratory bird conservation and sustainable development overlap within the country to aid future

341 planning but also to provide a framework by which a similar process could be applied to other  
342 Latin American countries that are of high importance for migratory species. Our study  
343 highlighted four key results regarding the degree of alignment between the distributions of  
344 Neotropical migrants of conservation concern and the ongoing programs within Colombia to  
345 protect or recover forests. First, most of the Forest Areas fall along the west slope of the western  
346 Andes and the east slope of the Eastern Andes with very little representation in central Andean  
347 areas. Second, almost half of Forested Areas overlapped with post-conflict territories where  
348 goals for economic development present a risk of forest loss if not done sustainably. Third, there  
349 was a large overlap between Forested Areas and Afro-descendant territories and Indigenous  
350 Reserves; most of this overlap was outside of established protected areas thus presenting an  
351 opportunity for community forest conservation that potentially benefits migratory birds. Fourth,  
352 we found very limited alignment between migrant focal areas and the priority Restoration and  
353 Rehabilitation Planning Areas identified by the Colombian National Restoration Plan; this lack  
354 of alignment suggests that alternative conservation strategies will be needed for migratory birds  
355 in these areas.

356  
357 Collaborative efforts between governments, NGOs and academia in North and Latin America  
358 have allowed the development of conservation plans to address threats for species such as  
359 Canada Warbler (ECCC and BirdLife International, 2021), Golden-winged Warbler (Bennett et  
360 al., 2018), and Cerulean Warbler (Fundación ProAves et al., 2010) during the overwintering  
361 period. Ongoing efforts such as the development of the Central and South America mid-elevation  
362 forest Conservation Investment Strategy (Partners In Flight, 2019) will integrate the strategies  
363 and actions of those three plans, and will benefit other Neotropical migrants and resident species  
364 across montane elevations in Central and South America. Despite those planning efforts to  
365 conserve migratory birds at montane elevations and the recognition of the importance of full-  
366 annual cycle conservation approaches to reverse declines, efforts directed from North America  
367 are still limited by current legislation. For instance, Canadian legislation such as the Migratory  
368 Bird Conservation Act focuses protection only on the breeding grounds and the Species at Risk  
369 Act only identifies critical habitat within Canada. Efforts within Canada alone are not enough to  
370 conserve Neotropical migrants as evidenced by the ongoing decline of 80% of the species  
371 breeding in the boreal or hardwood forest in Canada and overwintering in the Colombian Andes

372 (Hobson and Wilson, 2020). Additional programs and agreements that allow for conservation  
373 investments outside North America such as those already undertaken in the United States to  
374 conserve birds in the Caribbean and Latin America through the Neotropical Migratory Bird  
375 Conservation Act (NMBCA; Public Law 106-247) are urgently needed to implement  
376 conservation strategies in critical areas such as the Andes of Northern South America.

377

378 Forest cover along the West and East Andes presents opportunities for conservation efforts  
379 including the declaration of new protected areas but clearly necessitates additional strategies  
380 across private lands and in more central regions where little forest cover remains. For instance,  
381 Forest Areas, including Afro-descendant territories and Indigenous lands, have high potential for  
382 the implementation of community-based conservation strategies such as ecotourism. Indeed 20%  
383 of Forest Areas lay within the departments of Cauca and Nariño in the West Andes which have  
384 the highest diversity of birds in the country (Vélez et al., 2021). The potential economic and  
385 conservation benefits of bird-watching have also been highlighted in regions prioritized for  
386 economic development such as post-conflict territories (Ocampo-Peñuela and Winton, 2017)  
387 which covered 50% of Forest Areas. Support for bird-watching tourism including infrastructure  
388 investment, training of local guides, and promoting those regions as world-class birding  
389 destinations is needed to meet goals for economic growth while protecting forest (Ocampo-  
390 Peñuela and Winton, 2017, Echeverry et al. 2022).

391

392 The large overlap between Forest Areas and post-conflict territories and the emphasis on  
393 economic development in those regions presents a major challenge to the conservation of  
394 migratory species dependent on forest but also presents an important opportunity to incorporate  
395 needs of migrant birds into planning efforts. Such efforts have the potential to jointly benefit  
396 wildlife conservation and sustainable human livelihoods. A key aspect of the Colombian Peace  
397 Agreement is the need for an integral rural reform in order to address the historical drivers of  
398 persistent violence and armed conflict such as the concentration of land ownership and income,  
399 and farmer displacement (JEP, 2016). Post-conflict Development Programs are the planning and  
400 management instruments to implement the components of the rural reform and are the product of  
401 a consensus between local authorities and civil population with the aim of identifying regional  
402 priority needs and propose remediation projects (De la Rosa and Contreras, 2018).

403 Community participation, the revitalization of community-based organizational processes in the  
404 territory, and the alignment of interinstitutional efforts have been key for the implementation of  
405 Post-conflict Development Programs across several regions in Colombia (Barbosa et al., 2021).  
406 Those tools have allowed farmers and Indigenous and Afro-descendant communities to take  
407 advantage of the planning spaces of the Post-conflict Development Programs to strengthen their  
408 organizational and productive processes. One of the rural reform critical points was the  
409 Environmental Zoning Plan across post-conflict territories which defines management and  
410 conservation of areas of special environmental interest and facilitates the allocation of  
411 governmental support for community-based conservation programs including payment for  
412 environmental services and support to sustainable food production systems. For instance in  
413 October 2021, the Colombian government approved \$22 million USD for environmental projects  
414 across post-conflict territories (Presidencia de la Republica de Colombia, 2021). We urge  
415 national and international organizations to approach local organizations across post-conflict  
416 territories and align management actions for the conservation of migratory birds and other  
417 threatened species (e.g., Wilson et al. 2022) with regional planning and ongoing conservation  
418 strategies. Aligning conservation efforts for Neotropical migrants with post-conflict territories  
419 would affect half of the area of Forested Areas and would support sustainable social and  
420 environmental rural development. The need to align conservation efforts also applies to other  
421 regions across Migrant Focal Areas where engaging with regional or local institutions such as  
422 CARs is needed to maximize financial and logistic resources and to design and implement  
423 projects according to regional and local planning needs.

424  
425 Despite positive outcomes in some post-conflict territories, rural communities still face several  
426 challenges for environmental peacebuilding. Poor government commitment to implement the  
427 Peace Agreement and weak state presence and enforcement of environmental polices have  
428 resulted in increased deforestation rates, homicides, threats against social-environmental leaders,  
429 and pose unique socio-politic challenges for biodiversity conservation and management across  
430 many regions (Clerici et al., 2020; Graser et al., 2020; Negret et al., 2019; Prem et al., 2020). At  
431 a regional level, integrated management of natural resources between the civil society,  
432 international corporations, and national environmental agencies is urgently needed to implement  
433 initiatives that contribute to sustainable peace including the adoption of sustainable rural

434 development and the empowerment of local communities (Graser et al., 2020; Torres Rodríguez  
435 et al., 2020).

436

437 Almost 20% of remaining Forest Areas were located within Afro-descendant territories and  
438 Indigenous Reserves mainly in the West Andes however only 3% of the area is protected.  
439 Implementing conservation, or restoration, would be impossible across several regions without  
440 the leadership of Indigenous and other local communities and without recognizing their land  
441 rights. Engaging effectively with those communities to define conservation objectives in the  
442 context of economic development opportunities is needed to mitigate deforestation in these  
443 remote regions prone to deforestation (Negret et al., 2017). For example, this could be done  
444 through programs such as the conservation business strategies (Partners In Flight, 2019), where  
445 North American organizations involved in migratory bird conservation have an opportunity to  
446 align with local conservation groups that work with local communities to reduce deforestation  
447 and engage in restoration.

448

449 Established Protected areas covered about 30% of Forest Areas indicating that most remaining  
450 forested areas important for migratory birds lack any formal protection. This pattern is consistent  
451 with the poor protection of migratory birds in the global protected areas system (Runge et al.,  
452 2015). Our results show where the differing levels of protection afforded the Forest Areas might  
453 benefit from effective management and additional protection. Lack of effective management  
454 across protected areas represents a threat for declining Neotropical migrants and biodiversity  
455 (Runge et al., 2015). For instance, in Colombia, many protected areas had been found ineffective  
456 preventing forest loss (Negret et al., 2020). Moreover deforestation in protected areas and  
457 surrounding buffer areas increased after the Peace Agreement due, in part, to historical financial  
458 and operational weakness of the national government to enforce effective protection of public  
459 conservation areas (Clerici et al., 2020). The diversity of management strategies within the  
460 Colombian National Protected Areas System offers an opportunity for conservation planning  
461 across diverse landscapes. For instance, Protected Areas with Sustainable Use of Natural  
462 Resources such as Civil Society Natural Reserves would benefit declining Neotropical migrants  
463 through the conservation or restoration of forest in private lands. This approach can be  
464 implemented in highly deforested regions such as the Cauca and Magdalena Valley or in remote

465 regions with extensive remaining forest where economic development is expected, such as the  
466 West Andes.

467

468 The poor alignment between Migrant Focal Areas and Restoration and Rehabilitation Planning  
469 Areas is largely explained by the methodology used in the National Restoration Plan to identify  
470 key restoration regions. Areas susceptible to restoration and rehabilitation were identified, in  
471 part, by assessing the type of land-use change between the periods 2000-2002 and 2005-2009,  
472 and by identifying the regions affected by deforestation during four periods between 1990-2012  
473 (Vanegas Pinzón et al., 2015). However, the Colombian Andes have a persistent history of high  
474 human impact since pre-Columbian times and have experienced continuous population growth  
475 and economic development since the 1970's (Correa Ayram et al., 2020; Etter et al., 2008;  
476 Rodríguez Eraso et al., 2016). The vast majority of Migrant Focal Areas experienced forest loss  
477 prior to the 1990-2012 period used in the National Plan and therefore were not selected as areas  
478 for restoration and rehabilitation; thus, new approaches to target key restoration areas to benefit  
479 Neotropical migrants are needed. Indeed, over 60% of Migrant Focal Areas are covered by non-  
480 forested habitats and these are primarily productive lands for crops, pastures, and agroforestry  
481 systems. Increasing habitat availability and suitability for Neotropical migrants across those  
482 regions thus may largely depend on implementing conservation approaches within working lands  
483 that simultaneously support productive landscapes and human well-being while maintaining  
484 biodiversity and ecosystem services (Kremen and Merenlender, 2018). For instance, the  
485 implementation of biodiversity-based management techniques such as agroforestry and  
486 silvopastoral systems would increase the resilience of crop production to climate change (Vaast  
487 et al., 2016), and enhance the livelihood and food security of farmers (Hernandez-Aguilera et al.,  
488 2019; Waldron et al., 2017) while providing suitable habitat for Neotropical migrants (Colorado  
489 et al., 2018; González et al., 2020a, 2020b; McDermott et al., 2015).

490

#### 491 *Conclusions*

492 We provide Colombian and international conservation agencies with information needed to plan  
493 and implement avian conservation initiatives that can overlap with the socio-political, cultural  
494 and ethnical local context within Colombia. We also recognize that attempts to address  
495 conservation without the direct involvement and leadership of minority rural communities will



496 not only continue to be unethical, but will also likely result in unsuccessful conservation  
497 outcomes (Artelle et al., 2019). Extreme poverty in rural areas of Colombia is over three times as  
498 high as in urban areas (DANE, 2017), and higher levels of poverty among peasants, Indigenous  
499 and Afro-Colombian people are largely related to inequity in the distribution of land tenure  
500 which in turns increases deforestation pressure (Armenteras et al., 2019). The level of land  
501 tenure security can hinder the capacity of conservation organizations to influence land  
502 management decisions (Robinson et al., 2018). Promoting the legal recognition and protection of  
503 land and territorial rights of indigenous, Afro-Colombians, and rural communities, including  
504 their rights to self-governance, is key for the enrollment of those communities in sustainable  
505 conservation programs that require tenure security such as Payment for Ecosystem Services  
506 (PES) and to achieve effective conservation (Robinson et al., 2018; Worsdell et al., 2020).

507  
508 Local communities are an integral part of montane ecosystems used by declining Neotropical  
509 migrants, and timely and efficient conservation depends on identifying the regions and strategies  
510 that incorporate people as part of the solution to habitat loss and degradation (Armsworth et al.,  
511 2007; Dayer et al., 2020). Indeed, conservation approaches that support economical development  
512 and human wellbeing such as PES and integrated landscape management are often prioritized by  
513 conservation agencies in Latin America (Doak et al., 2014). Although these approaches have  
514 resulted in successful institutional planning and coordination, on-the-ground tangible outcomes  
515 in agriculture, livelihoods, and conservation domains are scarce. Some of the challenges that we  
516 need to address include unsupportive policies, lack of engagement of key stakeholders such as  
517 government and private sector and poor continuous financial and technical support to allow for  
518 adaptation to new frameworks (Estrada-Carmona et al., 2014). Moving beyond conservation  
519 planning and building strong partnerships to implementing on-the-ground strategies is a priority  
520 to produce tangible out comes that benefit humans and migratory and resident species together in  
521 the Neotropics.

522

## 523 **Acknowledgments**

524

525 Funding for this study was provided by Environment and Climate Change Canada – Science and  
526 Technology Branch. We are grateful to Nicholas J. Bayly for his feedback on the final draft of  
527 the manuscript.

528 Table 1. Land classes used in the analysis. Forest, Restoration and Rehabilitation Planning Areas  
529 were defined within Migrant Focal Areas. We assessed the overlap of Protected Areas, Afro-  
530 descendant territories and Indigenous Reserves, Post-conflict territories, and Autonomous  
531 Regional Corporations (CARs) with Forest, Restoration and Rehabilitation Planning Areas.

532

| Land classes                                                | Description                                                                                                                       |
|-------------------------------------------------------------|-----------------------------------------------------------------------------------------------------------------------------------|
| Migrant Focal Areas                                         | Elevation belt from 1000 - 2300 m where 4 or more of the six species are present.                                                 |
| Forest Areas                                                | Areas with forest cover, derived from C-LULC.                                                                                     |
| Restoration Planning Areas<br>Rehabilitation Planning Areas | Areas prioritized by the Colombian Restoration Plan.                                                                              |
| Protected Areas                                             | All Colombian National Protected Areas.                                                                                           |
| Afro-descendant territories and Indigenous Reserves         | Lands under a territorial management model.                                                                                       |
| Post-conflict territories (PDETs)                           | Regions severely affected by poverty, violence and inequality, and prioritized for rural development by the Colombian Government. |
| Autonomous Regional Corporations (CARs)                     | Entities responsible for environmental planning and administrating natural resources at a regional level.                         |

533

534

535

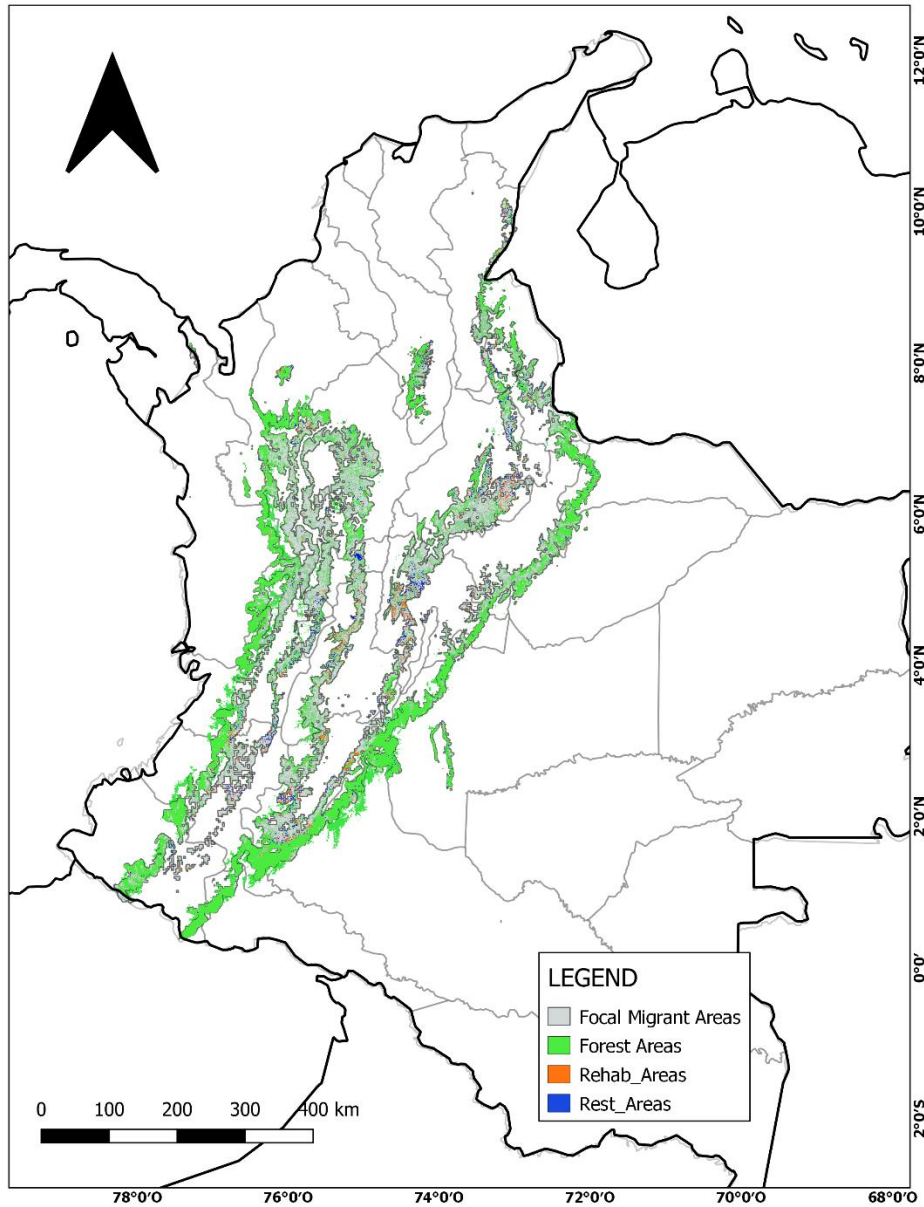

536

537 Figure 1. Migrant Focal Areas: Elevation belt from 1000 - 2300 m asl in Colombia where four or  
538 more of the six focal declining species are present. We identified and defined Forest,  
539 Rehabilitation and Restoration Planning Areas within Migrant Focal Areas. Gray regions  
540 indicate degraded areas within Migrant Focal Areas that are not prioritized by the Colombian  
541 National Restoration Plan.

542

543

544

545

546

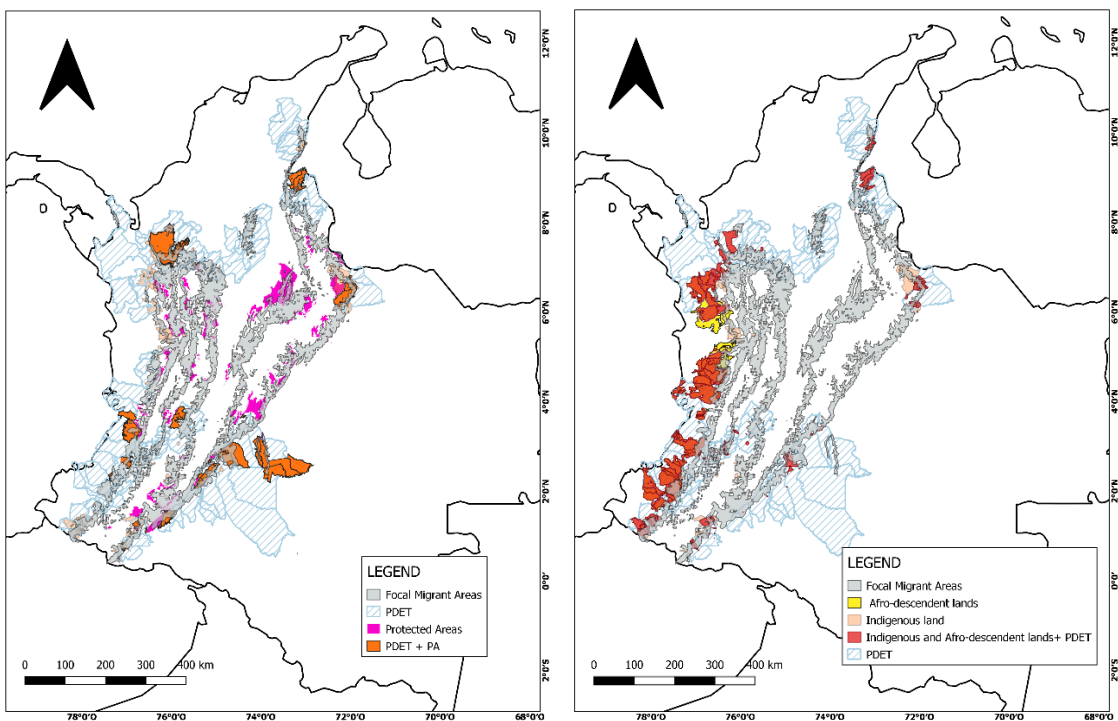

547

548

549 Figure 2. Migrant Focal Areas: Elevation belt from 1000 - 2300 m asl where four or more of the  
550 six focal declining species are present. A. Overlap of Migrant Focal Areas with Post-conflict  
551 territories (PDET), Protected Areas (PA), and overlap between PDET and PA. B. Overlap of  
552 Migrant Focal Areas with Afro-descendent lands, indigenous lands, and overlap between  
553 Indigenous and Afro-descendent lands and PDET.

554

555

556

557

558

559

560

561

562

563 References

- 564 [ESA] Endangered Species Act, 1973. Endangered Species Act of 1973 (16 U.S.C. 1531–1544,  
565 87 Stat. 884).
- 566 Aide, T.M., Grau, H.R., Graesser, J., Andrade-Núñez, M.J., Aráoz, E., Barros, A.P., Campos-  
567 Cerqueira, M., Chacon-Moreno, E., Cuesta, F., Espinoza, R., Peralvo, M., Polk, M.H.,  
568 Rueda, X., Sanchez, A., Young, K.R., Zarbá, L., Zimmerer, K.S., 2019. Woody vegetation  
569 dynamics in the tropical and subtropical Andes from 2001 to 2014: Satellite image  
570 interpretation and expert validation. *Glob. Chang. Biol.* 25, 2112–2126.  
571 <https://doi.org/10.1111/gcb.14618>
- 572 Arias, M.A., Ibañez, A.M., Zambrano, A., 2014. Agricultural Production Amid Conflict: The  
573 Effects of Shocks, Uncertainty, and Governance of Non-State Armed Actors Author &  
574 abstract. Bogotá D.C., Colombia.
- 575 Armenteras, D., Gast, F., Villareal, H., 2003. Andean forest fragmentation and the  
576 representativeness of protected natural areas in the eastern Andes, Colombia. *Biol.*  
577 *Conserv.* 113, 245–256. [https://doi.org/10.1016/S0006-3207\(02\)00359-2](https://doi.org/10.1016/S0006-3207(02)00359-2)
- 578 Armenteras, D., Negret, P., Melgarejo, L.F., Lakes, T.M., Londoño, M.C., García, J., Krueger,  
579 T., Baumann, M., Davalos, L.M., 2019. Curb land grabbing to save the Amazon. *Nat. Ecol.*  
580 *Evol.* <https://doi.org/10.1038/s41559-019-1020-1>
- 581 Armenteras, D., Rodríguez, N., Retana, J., Morales, M., 2011. Understanding deforestation in  
582 montane and lowland forests of the Colombian Andes. *Reg. Environ. Chang.* 11, 693–705.  
583 <https://doi.org/10.1007/s10113-010-0200-y>
- 584 Armsworth, P.R., Chan, K.M.A., Daily, G.C., Ehrlich, P.R., Kremen, C., Ricketts, T.H.,  
585 Sanjayan, M.A., 2007. Ecosystem-service science and the way forward for conservation.  
586 *Conserv. Biol.* <https://doi.org/10.1111/j.1523-1739.2007.00821.x>
- 587 Artelle, K.A., Zurba, M., Bhattacharya, J., Chan, D.E., Brown, K., Housty, J., Moola, F., 2019.  
588 Supporting resurgent Indigenous-led governance: A nascent mechanism for just and  
589 effective conservation. *Biol. Conserv.* 240. <https://doi.org/10.1016/j.biocon.2019.108284>
- 590 Barbosa, M. del P., Garcia, A., Maya, M., Sanabria, O., Valderrama, M., 2021. Logros y aciertos  
591 en la implementación de los Programas de Desarrollo con Enfoque Territorial – PDET.
- 592 Bennett, R.E., Rothman, A., Rosenberg, K. V, Rodríguez, F., 2018. Plan de conservación de la  
593 Reinita Alidorada (*Vermivora chrysoptera*) para la temporada no reproductiva. Golden-

- 594 winged Warbler working group.
- 595 Cespedes, L., Wilson, S., Bayly, N.J., 2021. Community modeling reveals the importance of  
596 elevation and land cover in shaping migratory bird abundance in the Andes. *Ecol. Appl.*  
597 e02481. <https://doi.org/10.1002/eap.2481>
- 598 Céspedes, L.N., Bayly, N.J., 2019. Over-winter ecology and relative density of Canada Warbler  
599 *Cardellina canadensis* in Colombia: The basis for defining conservation priorities for a  
600 sharply declining long-distance migrant. *Bird Conserv. Int.* 29, 232–248.  
601 <https://doi.org/10.1017/S0959270918000229>
- 602 Céspedes, L.N., Wilson, S., Bayly, N.J., 2021. Community modeling reveals the importance of  
603 elevation and land cover in shaping migratory bird abundance in the Andes. *Ecol. Appl.*  
604 31, e02481.
- 605 Chazdon, R.L., 2008. Beyond deforestation: Restoring forests and ecosystem services on  
606 degraded lands. *Science* (80-. ). 320, 1458–1460. <https://doi.org/10.1126/science.1155365>
- 607 Clerici, N., Armenteras, D., Kareiva, P., Botero, R., Ramírez-Delgado, J.P., Forero-Medina, G.,  
608 Ochoa, J., Pedraza, C., Schneider, L., Lora, C., Gómez, C., Linares, M., Hirashiki, C.,  
609 Biggs, D., 2020. Deforestation in Colombian protected areas increased during post-conflict  
610 periods. *Sci. Rep.* 10. <https://doi.org/10.1038/s41598-020-61861-y>
- 611 Colorado, G.J., Hamel, P.B., Rodewald, A.D., Mehlman, D., 2012. Advancing our understanding  
612 of the non-breeding distribution of Cerulean Warbler (*Setophaga cerulea*) in the Andes.  
613 *Ornitol. Neotrop.* 23, 307–315.
- 614 Colorado Z, G.J., Mehlman, D., Valencia-C, G., 2018. Effects of floristic and structural features  
615 of shade agroforestry plantations on the migratory bird community in Colombia. *Agrofor.*  
616 *Syst.* 92. <https://doi.org/10.1007/s10457-016-0034-9>
- 617 Correa Ayram, C.A., Etter, A., Díaz-Timoté, J., Rodríguez Buriticá, S., Ramírez, W., Corzo, G.,  
618 2020. Spatiotemporal evaluation of the human footprint in Colombia: Four decades of  
619 anthropic impact in highly biodiverse ecosystems. *Ecol. Indic.* 117, 106630.  
620 <https://doi.org/10.1016/j.ecolind.2020.106630>
- 621 DANE, 2017. Pobreza Monetaria y Multidimensional en Colombia 2017 [WWW Document].  
622 URL [https://www.dane.gov.co/index.php/estadisticas-por-tema/pobreza-y-condiciones-de-](https://www.dane.gov.co/index.php/estadisticas-por-tema/pobreza-y-condiciones-de-vida/pobreza-y-desigualdad/pobreza-monetaria-y-multidimensional-en-colombia-2017#pobreza-monetaria-y-multidimensional-en-colombia-2017)  
623 [vida/pobreza-y-desigualdad/pobreza-monetaria-y-multidimensional-en-colombia-](https://www.dane.gov.co/index.php/estadisticas-por-tema/pobreza-y-condiciones-de-vida/pobreza-y-desigualdad/pobreza-monetaria-y-multidimensional-en-colombia-2017#pobreza-monetaria-y-multidimensional-en-colombia-2017)  
624 [2017#pobreza-monetaria-y-multidimensional-en-colombia-2017](https://www.dane.gov.co/index.php/estadisticas-por-tema/pobreza-y-condiciones-de-vida/pobreza-y-desigualdad/pobreza-monetaria-y-multidimensional-en-colombia-2017#pobreza-monetaria-y-multidimensional-en-colombia-2017) (accessed 4.8.21).

- 625 Dayer, A.A., Silva-Rodríguez, E.A., Albert, S., Chapman, M., Zukowski, B., Ibarra, J.T.,  
626 Gifford, G., Echeverri, A., Martínez-Salinas, A., Sepúlveda-Luque, C., 2020. Applying  
627 conservation social science to study the human dimensions of Neotropical bird  
628 conservation. *Condor* 122. <https://doi.org/10.1093/condor/duaa021>
- 629 De la Rosa, M.D., Contreras, D., 2018. Instrumentos administrativos para la paz: Programas de  
630 Desarrollo con Enfoque Territorial (pdet), in: *Lecturas Sobre Derecho de Tierras. Tomo II.*  
631 Universidad Externado de Colombia, Bogotá, D.C., pp. 273–310.
- 632 Doak, D.F., Bakker, V.J., Goldstein, B.E., Hale, B., 2014. What is the future of conservation?  
633 *Trends Ecol. Evol.* <https://doi.org/10.1016/j.tree.2013.10.013>
- 634 ECCC and BirdLife International, 2021. Canada Warbler full-life-cycle Conservation Action  
635 Plan. . Gatineau, Québec, Canada and Quito, Ecuador.
- 636 Echeverry, A., Smith, J.R., MacArthur-Waltz, D., Lauck, K.S., Anderson, C.B.,  
637 Vargas, R.M., Quesada, I.A., Wood, S.A., Chaplin-Kramer, R., and Daily, GC.  
638 2022. Biodiversity and infrastructure interact to drive tourism to and within  
639 Costa Rica. *Proceedings of the National Academy of Sciences*. In press.
- 640 ESRI, 2019. ArcGIS Desktop: Release 10.
- 641 Estrada-Carmona, N., Hart, A.K., DeClerck, F.A.J., Harvey, C.A., Milder, J.C., 2014. Integrated  
642 landscape management for agriculture, rural livelihoods, and ecosystem conservation: An  
643 assessment of experience from Latin America and the Caribbean. *Landsc. Urban Plan.* 129,  
644 1–11. <https://doi.org/10.1016/j.landurbplan.2014.05.001>
- 645 Etter, A., McAlpine, C., Possingham, H., 2008. Historical patterns and drivers of landscape  
646 change in Colombia since 1500: a regionalized spatial approach. *Ann. Assoc. Am. Geogr.*  
647 98, 2–23. <https://doi.org/10.1080/00045600701733911>
- 648 Fink, D., Auer, T., Johnston, A., Ruiz-Gutierrez, V., Hochachka, W.M., Kelling, S., 2020.  
649 Modeling avian full annual cycle distribution and population trends with citizen science  
650 data. *Ecol. Appl.* 30. <https://doi.org/10.1002/eap.2056>
- 651 Fink, D., Auer, T., Johnston, A., Strimas-Mackey, M., Illif, M., Kelling, S., 2018. eBird Status  
652 and Trends, Version November 2018, eBird Status and Trends, Version November 2018.  
653 Ithaca, NY, USA.
- 654 Fundación ProAves, America Bird Conservancy, El Grupo Cerúleo, 2010. Conservation Plan for  
655 the Cerulean Warbler on its nonbreeding range—Plan de conservación para la Reinita

- 656 Cerúlea sobre su rango no reproductivo. *Conserv. Colomb.* 12, 1–62.
- 657 González, A.M., Bayly, N.J., Colorado, G.J., Hobson, K.A., 2017. Topography of the Andes  
658 mountains shapes the wintering distribution of a migratory bird. *Divers. Distrib.* 23, 118–  
659 129. <https://doi.org/10.1111/ddi.12515>
- 660 González, A.M., Bayly, N.J., Hobson, K.A., 2020a. Earlier and slower or later and faster: Spring  
661 migration pace linked to departure time in a Neotropical migrant songbird. *J. Anim. Ecol.*  
662 89, 2840–2851. <https://doi.org/10.1111/1365-2656.13359>
- 663 González, A.M., Wilson, S., Bayly, N.J., Hobson, K.A., 2020b. Contrasting the suitability of  
664 shade coffee agriculture and native forest as overwinter habitat for Canada Warbler  
665 (*Cardellina canadensis*) in the Colombian Andes. *Condor* 122, 1–12.  
666 <https://doi.org/10.1093/condor/duaa011>
- 667 González, J., Cubillos, Á., Chadid, M., Cubillos, A., Arias, M., Zúñiga, E., Joubert, F., Pérez, I.,  
668 Berrío, V., 2018. Caracterización de las principales causas y agentes de la deforestación a  
669 nivel nacional período 2005-2015. Bogotá, Colombia.
- 670 Graser, M., Bonatti, M., Eufemia, L., Morales, H., Lana, M., Löhr, K., Sieber, S., 2020.  
671 Peacebuilding in rural Colombia-a collective perception of the Integrated Rural Reform  
672 (IRR) in the department of Caqueta (Amazon). *Land* 9.  
673 <https://doi.org/10.3390/land9020036>
- 674 Hernandez-Aguilera, J.N., Conrad, J.M., Gómez, M.I., Rodewald, A.D., 2019. The Economics  
675 and Ecology of Shade-grown Coffee: A Model to Incentivize Shade and Bird  
676 Conservation. *Ecol. Econ.* 159, 110–121. <https://doi.org/10.1016/j.ecolecon.2019.01.015>
- 677 Hijmans, R.J., 2019. raster: Geographic data analysis and modeling.
- 678 Hobson, K.A., Wilson, S., 2020. The avian conservation crisis, Canada's international record, and  
679 the need for a new path forward. *Avian Conserv. Ecol.* 15. [https://doi.org/10.5751/ACE-](https://doi.org/10.5751/ACE-01756-150222)  
680 [01756-150222](https://doi.org/10.5751/ACE-01756-150222)
- 681 Holdridge, L.R., 1947. Determination of world plant formations from simple climatic data.  
682 *Science* (80-. ). 105, 367–368. <https://doi.org/10.1126/science.105.2727.367>
- 683 IDEAM - Instituto de Hidrología, M. y E.A., 2018. Cobertura de la Tierra Metodología CORINE  
684 Land Cover Adaptada para Colombia Periodo 2018. República de Colombia. Escala  
685 1:100.000. Año 2021 [WWW Document]. URL  
686 <http://geoservicios.ideam.gov.co/geonetwork/srv/eng/catalog.search#/metadata/285c4d0a->



687 6924-42c6-b4d4-6aef2c1aceb5  
688 IGAC. Instituto geográfico Agustín Codazzi, 2021. Sistema de información geográfica para la  
689 planeación y el ordenamiento territorial.  
690 IUCN. International Union for Conservation of Nature, 2008. Guidelines for applying protected  
691 area management categories. Gland, Switzerland.  
692 JEP. Jurisdicción Especial para la paz, 2016. Acuerdo final para la terminación del conflicto y la  
693 construcción de la paz estable y duradera [WWW Document]. URL  
694 <https://www.jep.gov.co/Normativa/Paginas/Acuerdo-Final.aspx> (accessed 3.29.21).  
695 Kramer, G.R., Andersen, D.E., Buehler, D.A., Wood, P.B., Peterson, S.M., Lehman, J.A.,  
696 Aldinger, K.R., Bulluck, L.P., Harding, S., Jones, J.A., Loegering, J.P., Smalling, C.,  
697 Vallender, R., Streby, H.M., 2018. Population trends in Vermivora warblers are linked to  
698 strong migratory connectivity. *Proc. Natl. Acad. Sci. U. S. A.* 115, E3192–E3200.  
699 <https://doi.org/10.1073/pnas.1718985115>  
700 Kremen, C., Merenlender, A.M., 2018. Landscapes that work for biodiversity and people.  
701 *Science* (80-. ). <https://doi.org/10.1126/science.aau6020>  
702 López-Cubillos, S., Runting, R.K., Suárez-Castro, A.F., Williams, B.A., Armenteras, D., Manuel  
703 Ochoa-Quintero, J., McDonald-Madden, E., 2022. Spatial prioritization to achieve the  
704 triple bottom line in Payment for ecosystem services design. *Ecosyst. Serv.* 55.  
705 <https://doi.org/10.1016/j.ecoser.2022.101424>  
706 McDermott, M.E., Rodewald, A.D., Matthews, S.N., 2015. Managing tropical agroforestry for  
707 conservation of flocking migratory birds. *Agrofor. Syst.* 89.  
708 <https://doi.org/10.1007/s10457-014-9777-3>  
709 Minambiente, 2015. Plan nacional de restauración. Restauración ecológica, rehabilitación y  
710 recuperación de áreas disturbadas. Bogotá D.C., Colombia.  
711 Ministerio de Agricultura y Desarrollo Rural, 2020. Decreto 130 de 2020. “Por el cual se  
712 sustituye el Título 1 de la Parte 3 del Libro 2 del Decreto 1071 de 2015, Decreto Único  
713 Reglamentario del Sector Agropecuario, Pesquero y de Desarrollo Rural, relacionado con  
714 el Certificado de Incentivo Forestal-CIF.” Bogotá D.C., Colombia.  
715 Murdoch, W., Polasky, S., Wilson, K.A., Possingham, H.P., Kareiva, P., Shaw, R., 2007.  
716 Maximizing return on investment in conservation. *Biol. Conserv.* 139, 375–388.  
717 <https://doi.org/10.1016/j.biocon.2007.07.011>

- 718 Myers, N., Mittermeyer, R.A., Mittermeyer, C.G., Da Fonseca, G.A.B., Kent, J., 2000.  
719 Biodiversity hotspots for conservation priorities. *Nature*. <https://doi.org/10.1038/35002501>
- 720 Negret, P.J., Allan, J., Braczkowski, A., Maron, M., Watson, J.E.M., 2017. Need for  
721 conservation planning in postconflict Colombia. *Conserv. Biol.* 31, 499–500.  
722 <https://doi.org/10.1111/cobi.12935>
- 723 Negret, P.J., Marco, M. Di, Sonter, L.J., Rhodes, J., Possingham, H.P., Maron, M., 2020. Effects  
724 of spatial autocorrelation and sampling design on estimates of protected area effectiveness.  
725 *Conserv. Biol.* 34. <https://doi.org/10.1111/cobi.13522>
- 726 Negret, P.J., Maron, M., Fuller, R.A., Possingham, H.P., Watson, J.E.M., Simmonds, J.S., 2021.  
727 Deforestation and bird habitat loss in Colombia. *Biol. Conserv.* 257.  
728 <https://doi.org/10.1016/j.biocon.2021.109044>
- 729 Negret, P.J., Sonter, L., Watson, J.E.M., Possingham, H.P., Jones, K.R., Suarez, C., Ochoa-  
730 Quintero, J.M., Maron, M., 2019. Emerging evidence that armed conflict and coca  
731 cultivation influence deforestation patterns. *Biol. Conserv.* 239, 108176.  
732 <https://doi.org/10.1016/j.biocon.2019.07.021>
- 733 Ocampo-Peñuela, N., Winton, R.S., 2017. Economic and Conservation Potential of Bird-  
734 Watching Tourism in Postconflict Colombia. *Trop. Conserv. Sci.* 10.  
735 <https://doi.org/10.1177/1940082917733862>
- 736 Orme, C.D.L., Davies, R.G., Burgess, M., Eigenbrod, F., Pickup, N., Olson, V.A., Webster, A.J.,  
737 Ding, T.S., Rasmussen, P.C., Ridgely, R.S., Stattersfield, A.J., Bennett, P.M., Blackburn,  
738 T.M., Gaston, K.J., Owens, I.P.F., 2005. Global hotspots of species richness are not  
739 congruent with endemism or threat. *Nature* 436, 1016–1019.  
740 <https://doi.org/10.1038/nature03850>
- 741 Partners In Flight, 2019. Central and South American Bird Conservation Business Plan 2019.
- 742 Prem, M., Saavedra, S., Vargas, J.F., 2020. End-of-conflict deforestation: Evidence from  
743 Colombia's peace agreement. *World Dev.* 129, 104852.  
744 <https://doi.org/10.1016/j.worlddev.2019.104852>
- 745 Presidencia de la Republica de Colombia, 2021. Aprueban \$90 mil millones para proyectos  
746 ambientales y productivos en municipios PDET [WWW Document]. URL  
747 [https://www.portalparalapaz.gov.co/publicaciones/1843/aprueban-90-mil-millones-para-](https://www.portalparalapaz.gov.co/publicaciones/1843/aprueban-90-mil-millones-para-proyectos-ambientales-y-productivos-en-municipios-pdet/)  
748 [proyectos-ambientales-y-productivos-en-municipios-pdet/](https://www.portalparalapaz.gov.co/publicaciones/1843/aprueban-90-mil-millones-para-proyectos-ambientales-y-productivos-en-municipios-pdet/) (accessed 3.30.22).

- 749 R Core Team, 2020. R: A language and environment for statistical computing.
- 750 Robinson, B.E., Masuda, Y.J., Kelly, A., Holland, M.B., Bedford, C., Childress, M., Fletschner,  
751 D., Game, E.T., Ginsburg, C., Hilhorst, T., Lawry, S., Miteva, D.A., Musengezi, J.,  
752 Naughton-Treves, L., Nolte, C., Sunderlin, W.D., Veit, P., 2018. Incorporating Land  
753 Tenure Security into Conservation. *Conserv. Lett.* <https://doi.org/10.1111/conl.12383>
- 754 Rodríguez Eraso, N., Armenteras, D., Morales, M., Romero, M., 2016. *Ecosistemas de los Andes*  
755 *Colombianos*. Segunda edición. Bogota, Colombia.
- 756 Rosenberg, K. V., Dokter, A.M., Blancher, P.J., Sauer, J.R., Smith, A.C., Smith, P.A., Stanton,  
757 J.C., Panjabi, A., Helft, L., Parr, M., Marra, P.P., 2019. Decline of the North American  
758 avifauna. *Science* (80- ). 366, 120–124. <https://doi.org/10.1126/science.aaw1313>
- 759 RUNAP. Registro Único Nacional de Áreas Protegidas [WWW Document], 2021. URL  
760 <https://runap.parquesnacionales.gov.co/> (accessed 3.1.21).
- 761 Runge, C.A., Watson, J.E.M., Butchart, S.H.M., Hanson, J.O., Possingham, H.P., Fuller, R.A.,  
762 2015. Protected areas and global conservation of migratory birds. *Science* (80- ). 350.  
763 <https://doi.org/10.1126/science.aac9180>
- 764 SARA. Species At Risk Act, 2002. Bill C-5, An act respecting the protection of wildlife species  
765 at risk in Canada.
- 766 Scarlett, L., McKinney, M., 2016. Connecting people and places: The emerging role of network  
767 governance in large landscape conservation. *Front. Ecol. Environ.*  
768 <https://doi.org/10.1002/fee.1247>
- 769 Schuster, R., Wilson, S., Rodewald, A.D., Arcese, P., Fink, D., Auer, T., Bennett, J.R., 2019.  
770 Optimizing the conservation of migratory species over their full annual cycle. *Nat.*  
771 *Commun.* 10. <https://doi.org/10.1038/s41467-019-09723-8>
- 772 Tejedor-Garavito, N., Álvarez, E., Arango-Caro, S., Araujo-Murakami, A., Blundo, C., Boza-  
773 Espinoza, T.E., La Torre-Cuadros, M.A., Gaviria, J., Gutiérrez, N., Jørgensen, P.M., León,  
774 B., López-Camacho, R., Malizia, L., Millán, B., Moraes, M., Pacheco, S., Rey-Benayas,  
775 J.M., Reynel, C., Timaná de la Flor, M., Ulloa-Ulloa, C., Vacas-Cruz, O., Newton, A.C.,  
776 2012. Evaluación del estado de conservación de los bosques montanos en los Andes  
777 tropicales. *Ecosistemas* 21, 148–166. <https://doi.org/10.7818/re.2014.21-1-2.00>
- 778 Torres Rodríguez, A.C., Binda, E., Ochoa Quintero, J.M., Garcia, H., Gómez, B., Soto, C.,  
779 Martínez, S., Clerici, N., 2020. Answering the right questions. Addressing biodiversity

- 780 conservation in post-conflict Colombia. *Environ. Sci. Policy* 104.  
781 <https://doi.org/10.1016/j.envsci.2019.11.012>
- 782 Vaast, P., Harmand, J.-M., Rapidel, B., Jagoret, P., Deheuvels, O., 2016. Coffee and Cocoa  
783 Production in Agroforestry—A Climate-Smart Agriculture Model, in: *Climate Change and*  
784 *Agriculture Worldwide*. [https://doi.org/10.1007/978-94-017-7462-8\\_16](https://doi.org/10.1007/978-94-017-7462-8_16)
- 785 Vanegas Pinzón, S., Ospina Arango, O.L., Escobar Niño, G.A., Ramirez, W., Sánchez, J.J.,  
786 2015. *Plan Nacional de Restauración: restauración ecológica, rehabilitación y recuperación*  
787 *de áreas disturbadas*. Bogotá, Colombia.
- 788 Vélez, D., Tamayo, E., Ayerbe-Quiñones, F., Torres, J., Rey, J., Castro-Moreno, C., Ramírez, B.,  
789 Ochoa-Quintero, J.M., 2021. Distribution of birds in Colombia. *Biodivers. Data J.* 9.  
790 <https://doi.org/10.3897/BDJ.9.e59202>
- 791 Waldron, A., Garrity, D., Malhi, Y., Girardin, C., Miller, D.C., Seddon, N., 2017. Agroforestry  
792 Can Enhance Food Security While Meeting Other Sustainable Development Goals. *Trop.*  
793 *Conserv. Sci.* 10. <https://doi.org/10.1177/1940082917720667>
- 794 Wilson, S., Lin, H.Y., Schuster, R., González, A.M., Gómez, C., Botero-Delgadillo, E., Bayly,  
795 N.J., Bennett, J.R., Rodewald, A.D., Roehrdanz, P.R., Ruiz Gutierrez, V., 2022.  
796 Opportunities for the conservation of migratory birds to benefit threatened resident  
797 vertebrates in the Neotropics. *J. Appl. Ecol.* 59, 653–663. [https://doi.org/10.1111/1365-](https://doi.org/10.1111/1365-2664.14077)  
798 [2664.14077](https://doi.org/10.1111/1365-2664.14077)
- 799 Wilson, S., Saracco, J.F., Krikun, R., Flockhart, D.T.T., Godwin, C., Foster, K.R., 2018. Drivers  
800 of demographic decline across the annual cycle of a threatened migratory bird. *Sci. Rep.* 8.  
801 <https://doi.org/10.1038/s41598-018-25633-z>
- 802 Wilson, S., Schuster, R., Rodewald, A.D., Bennett, J.R., Smith, A.C., La Sorte, F.A., Verburg,  
803 P.H., Arcese, P., 2019. Prioritize diversity or declining species? Trade-offs and synergies  
804 in spatial planning for the conservation of migratory birds in the face of land cover change.  
805 *Biol. Conserv.* 239, 108285. <https://doi.org/10.1016/j.biocon.2019.108285>
- 806 Worsdell, T., Kumar, K., Allan, J.R., Gibbon, G.E.M., White, A., Khare, A., Frechette, A., 2020.  
807 *Rights-Based Conservation: The path to preserving Earth’s biological and cultural*  
808 *diversity?* Washington, DC.
- 809 Zúñiga-Upegui, P., Arnaiz-Schmitz, C., Herrero-Jáuregui, C., Smart, S.M., López-Santiago,  
810 C.A., Schmitz, M.F., 2019. Exploring social-ecological systems in the transition from war

811 to peace: A scenario-based approach to forecasting the post-conflict landscape in a  
812 Colombian region. *Sci. Total Environ.* 695.  
813 <https://doi.org/10.1016/j.scitotenv.2019.133874>  
814
